# Supplementary material for: Isolation, expression, and biochemical characterization: nitrite reductase from Bacillus cereus LJ01
Source: Royal Society of Chemistry journal article supplement (doi:10.1039/d0ra06129h), 2020-01-01
Supplement: d0ra06129h1.pdf [file d0ra06129h1.pdf]

## Supplementary Materials

**Supplementary Table S1** Nature of LJ01 strain and its physiological and biochemical identification.

| Characteristics               | Results      | Characteristics                    | Results |
|-------------------------------|--------------|------------------------------------|---------|
| <b>Colony characteristics</b> |              | <b>Biochemical characteristics</b> |         |
| Shape                         | irregular    | Catalase test                      | +       |
| Borderline                    | out of order | Oxidase test                       | -       |
| Uplift                        | heave        | Gelatin liquefaction               | +       |
| Surface                       | dry          | Nitrate reduction                  | +       |
| Gram-reaction                 | positive     | Nitrite reduction                  | +       |
| Shape of cells                | rod          | Amylolysis                         | +       |
| Spore                         | +            | Citrate utilization                | -       |
| Movability                    | +            | Phenylalanine deaminase test       | -       |
|                               |              | Eggs creamy enzyme test            | +       |
|                               |              | Indole test                        | -       |
| Physiological characteristics |              | Urease test                        | -       |
| Culture conditions            |              | Casein hydrolysis                  | -       |
| Growth temperature            |              | Tyrosine hydrolysis                | -       |
| 30 °C                         | +            | V-P test                           | +       |
| 40 °C                         | +            | Carbon source utilization          |         |
| 50 °C                         | -            | Pectinose                          | -       |
| Sodium chloride tolerance     | 2-10%        | D-Mannitol                         | -       |
| Amphimicrobial                | +            | Glucose                            | -       |
|                               |              | D- glucose                         | +       |

According to the *Bergey's bacterial identification manual*, the morphological characteristics, physiological biochemical characteristics, and 16S rDNA sequence of LJ01 were highly same as *Bacillus cereus*.

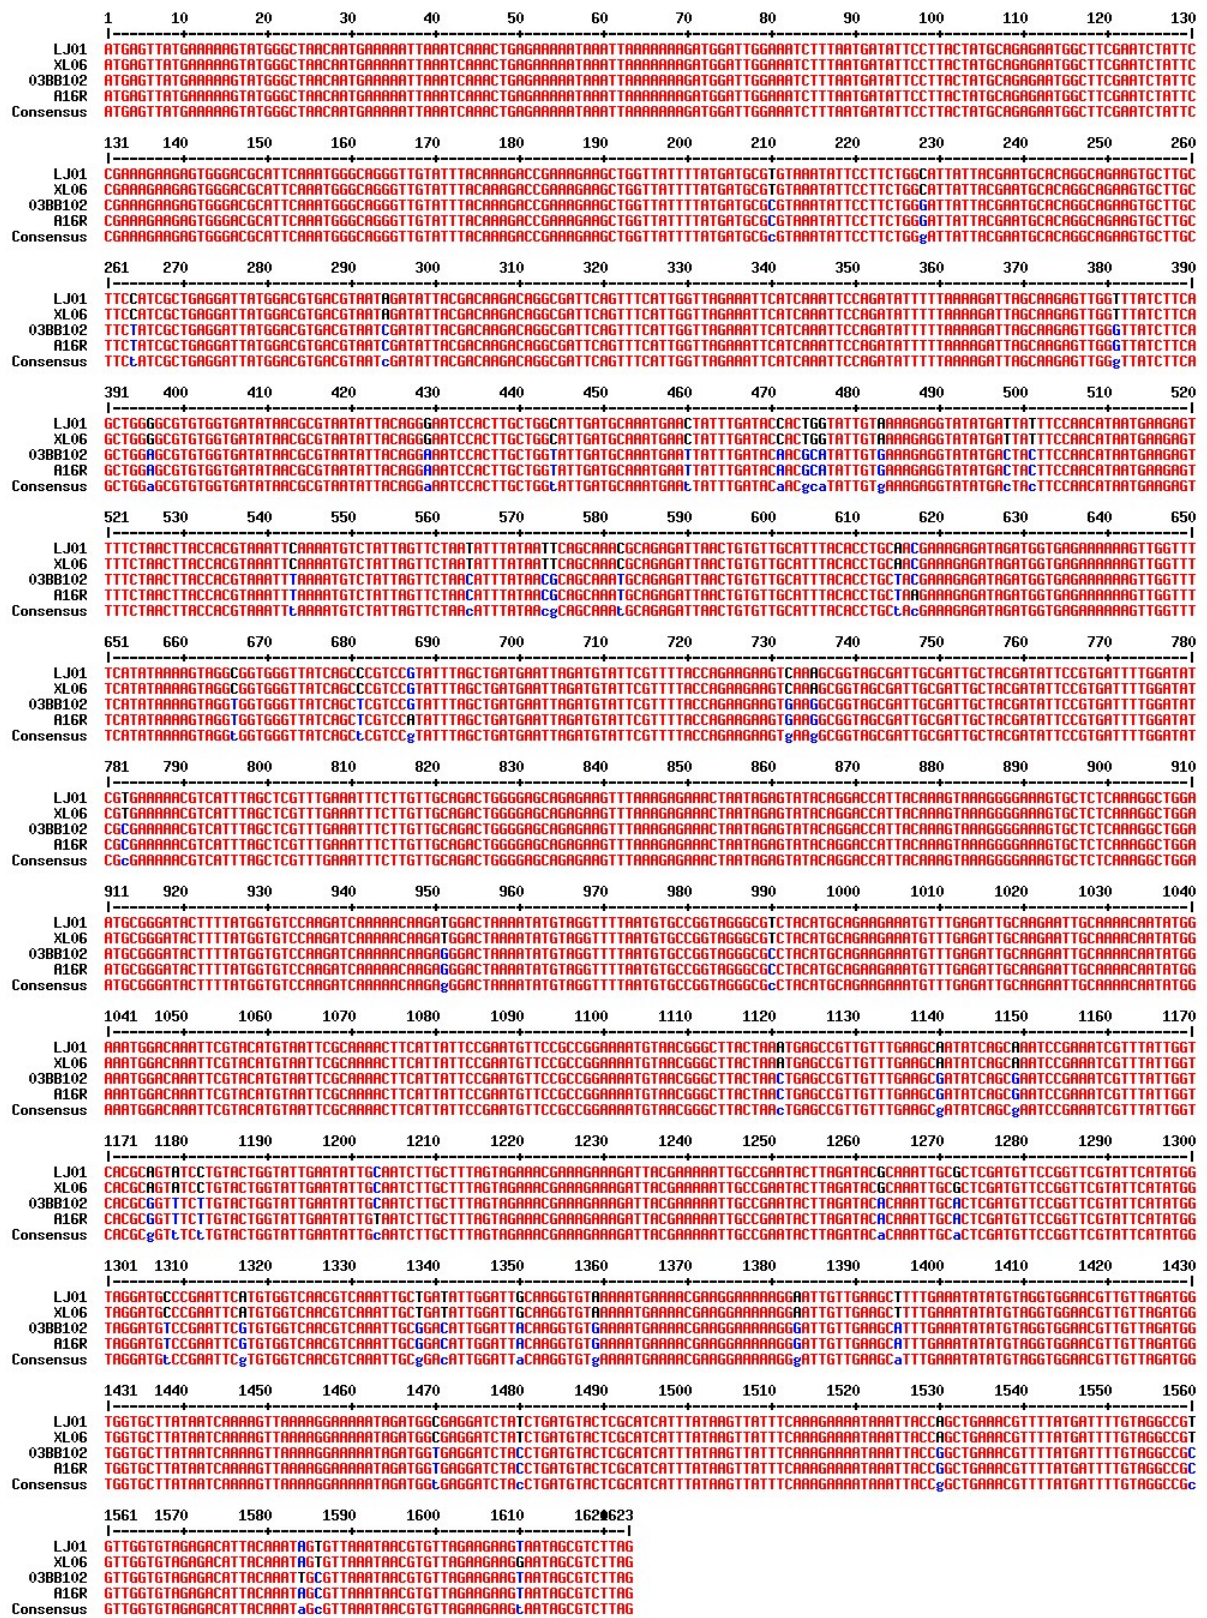

9

10 **Fig. S1 Alignment of nitrite reductase genes.** LJ01: This study (GenBank: MG839504); XL06: *Bacillus thuringiensis*  
 11 strain XL6 (GenBank: CP013000.1); 03BB102: *Bacillus cereus* strain 03BB102 (GenBank: CP009318.1); A16R: *Bacillus*  
 12 *anthracis* strain A16R (GenBank: CP001974.2).

13

14



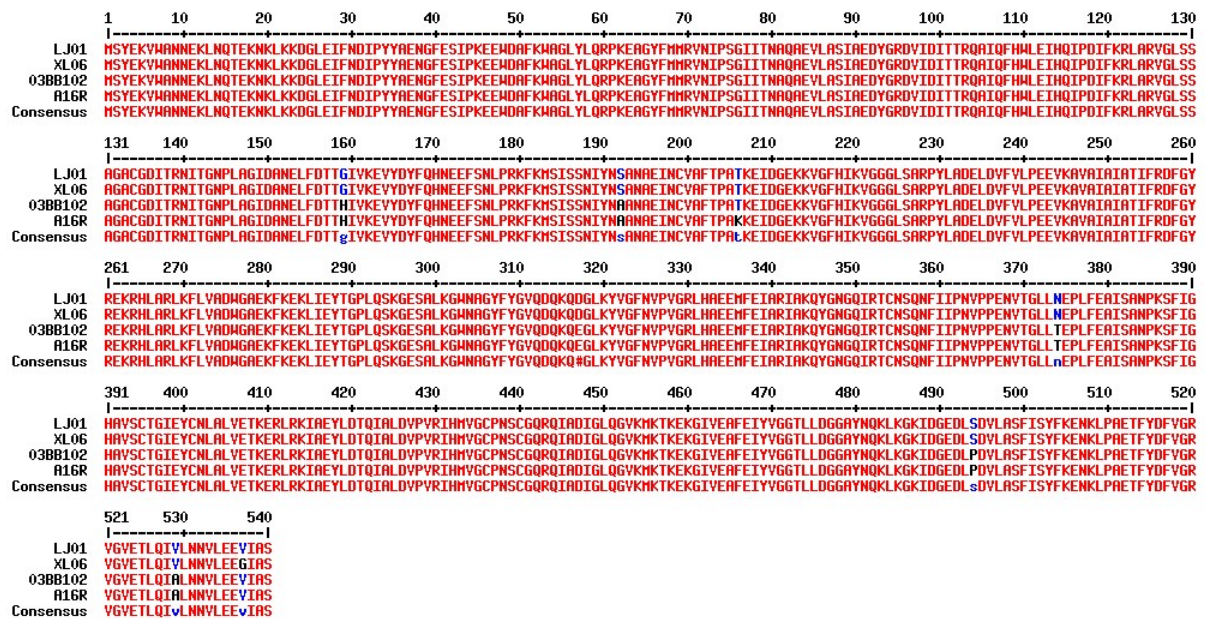

15

16 **Fig. S2 Alignment of nitrite reductase.** LJ01: This study (GenBank: MG839504); XL06: *Bacillus thuringiensis* strain  
 17 XL6 (GenBank: CP013000.1); 03BB102: *Bacillus cereus* strain 03BB102 (GenBank: CP009318.1); A16R: *Bacillus*  
 18 *anthracis* strain A16R (GenBank: CP001974.2).

19
